# Supplementary material
Source: publisher figshare collection journal article supplement (https://acs.figshare.com/ndownloader/files/7426759)
Supplement: Supplementary file 1 [file 7426759]

## Supporting Information for

# Covalent functionalisation of Organic Nanoparticles by Aryl Diazonium chemistry and their Solvent Dependent Self-assembly

Sreedevi Krishnakumar<sup>†</sup> and Karical R. Gopidas<sup>†‡\*</sup>

<sup>†</sup> Photosciences and Photonics, Chemical Sciences and Technology Division, CSIR-National Institute for Interdisciplinary Science and Technology, Council of Scientific and Industrial Research (CSIR), Trivandrum 695019, India.

<sup>‡</sup> Academy of Scientific and Innovative Research (AcSIR), CSIR-NIIST Campus, Thiruvananthapuram.

| Contents                                                                        | Page |
|---------------------------------------------------------------------------------|------|
| 1. Chemical structure of RuN <sub>2</sub> <sup>+</sup>                          | S2   |
| 2. Absorption and emission spectra of RuFDN, FDN, Rubpy                         | S2   |
| 3. IR spectra of RuN <sub>2</sub> <sup>+</sup> and RuFDN                        | S3   |
| 4. EDX analysis                                                                 | S4   |
| 5. Elemental composition of RuFDN                                               | S4   |
| 6. Thermogram of RuFDN and FDN                                                  | S5   |
| 7. Possible structures formed on multiple layering.                             | S5   |
| 8. Lifetime measurements of RuFDN and FDN                                       | S6   |
| 9. TEM and AFM images of RuFDN at 5 × 10 <sup>-4</sup> M concentration in water | S7   |
| 10. AFM images of RuFDN in dichloromethane                                      | S7   |
| 11. TEM image of RuFDN in acetonitrile                                          | S8   |
| 12. AFM images of RuFDN in acetone                                              | S8   |
| 13. SEM and confocal fluorescence images of RuFDN                               | S9   |
| 14. Zeta potential measurements                                                 | S9   |
| 15. Quenching studies                                                           | S10  |

## 1. Chemical structure of $\text{RuN}_2^+$

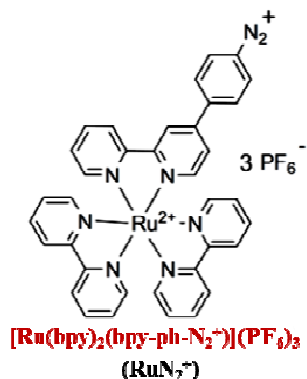

Figure S1. Chemical structure of  $\text{RuN}_2^+$

## Characterization of RuFDN

### 2. Absorption and emission spectra of RuFDN

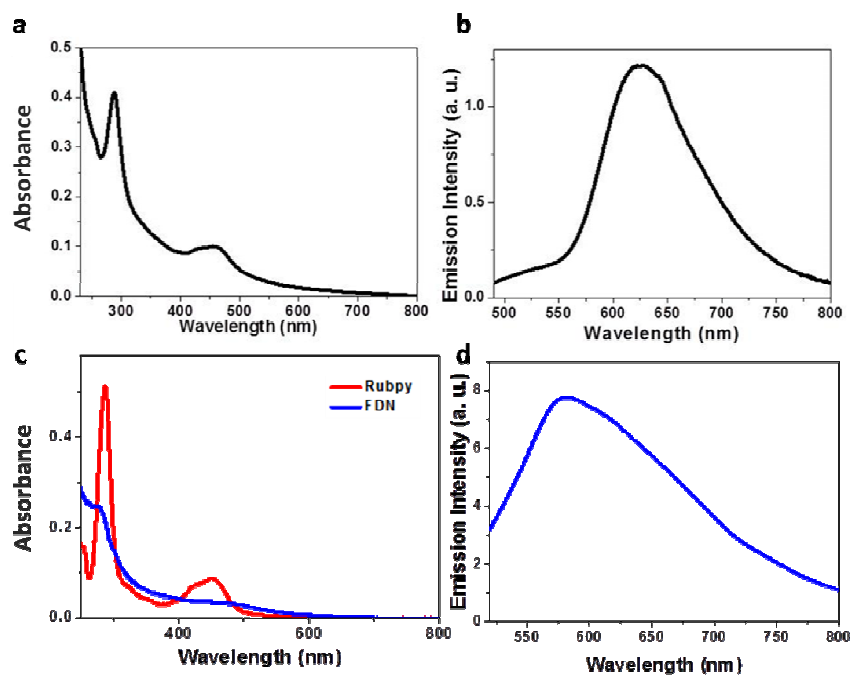

Figure S2. (a) Absorption and (b) emission spectra of RuFDN in acetonitrile. (c) Absorption spectra of Rubpy and FDN (conc. =  $1.3 \times 10^{-6}$  M, Solvent = acetonitrile). (d) Emission spectrum of FDN (conc. =  $1.3 \times 10^{-4}$  M, Solvent = acetonitrile).

### 3. IR spectra of $\text{RuN}_2^+$ and RuFDN

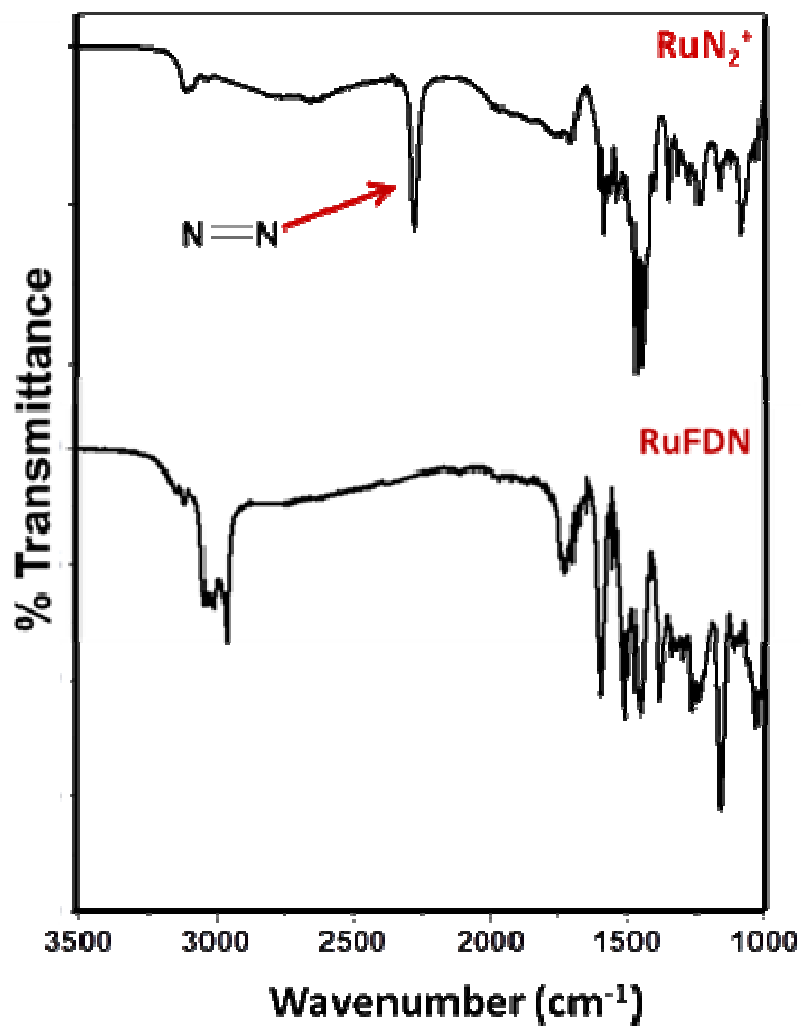

**Figure S3.** IR spectra of  $\text{RuN}_2^+$  (top) and RuFDN (bottom).

#### 4. EDX analysis

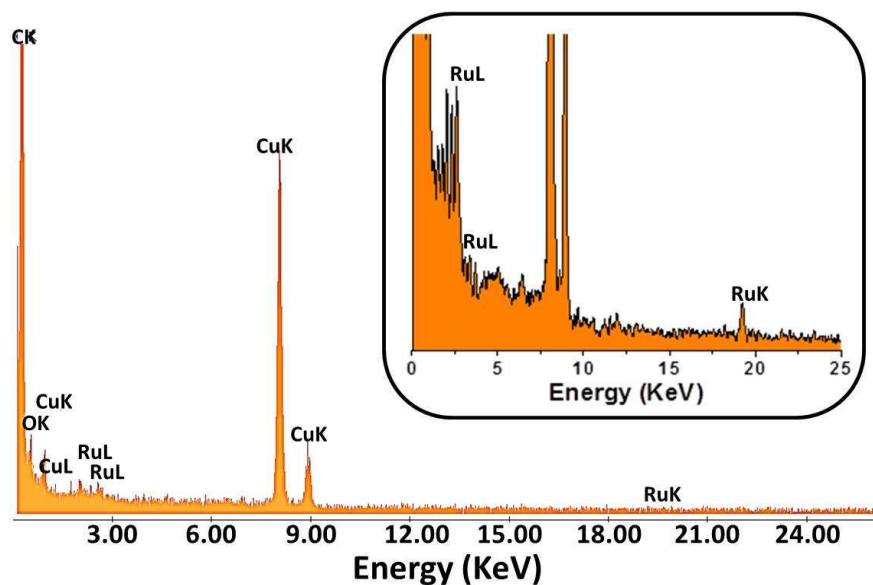

**Figure S4.** EDX spectrum of RuFDN (inset shows the expanded EDX spectrum).

#### 5. Elemental composition of RuFDN

| Element | Atomic % |
|---------|----------|
| C       | 90.6     |
| O       | 2.1      |
| Cu      | 7.2      |
| Ru      | 0.1      |
| Total   | 100.0    |

**Table ST1.** Atomic percentage of FDN obtained from quantitative EDX analysis.

## 6. Thermogram of RuFDN and FDN.

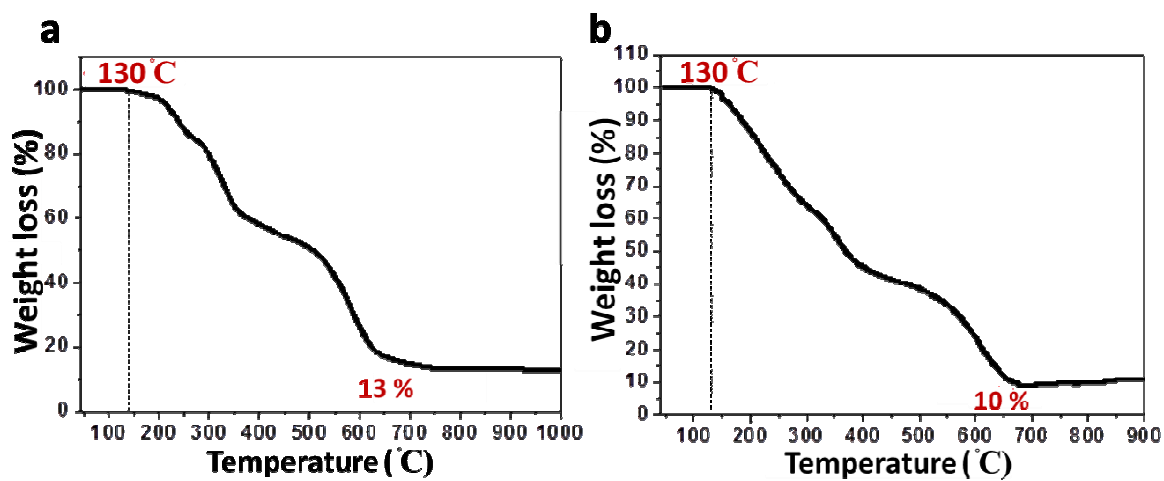

Figure S5. Thermogram of (a) RuFDN and (b) FDN.

## 7. Possible structures formed on multiple layering

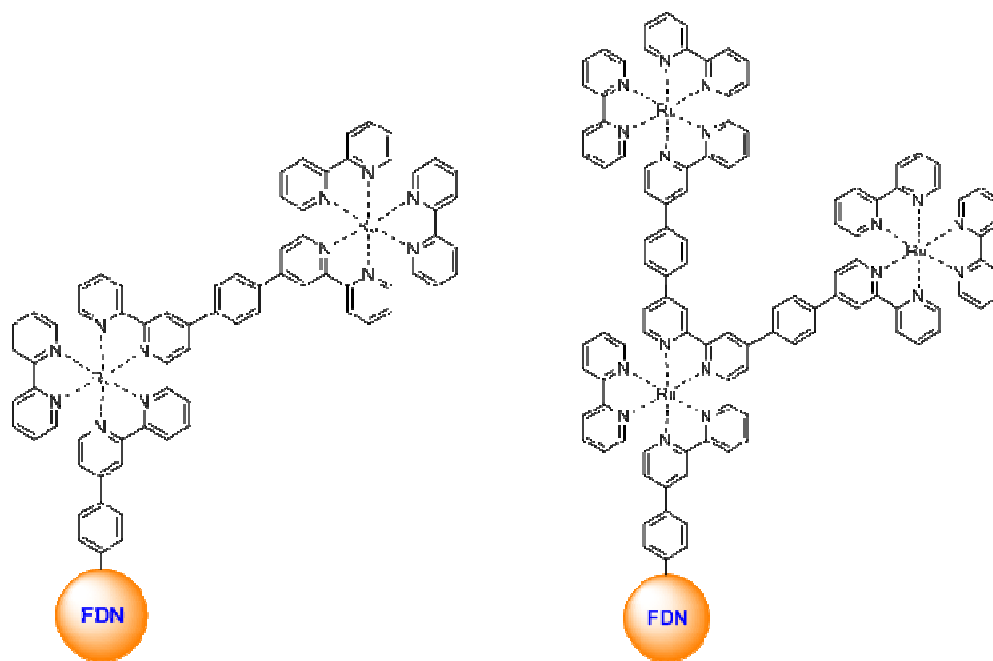

Figure S6. Possible structures formed on multiple layering.

## 8. Lifetime measurements of RuFDN and FDN

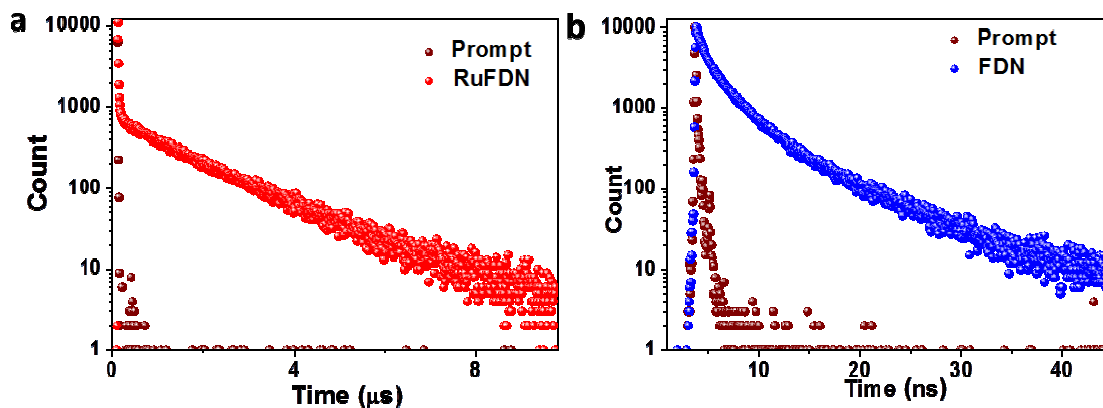

**Figure S7.** Emission decay profiles of (a) RuFDN and (b) FDN in acetonitrile ( $\lambda_{\text{exc}} = 440 \text{ nm}$  )

|              | $\tau_1 \text{ (ns)}$ | $\chi_1$     | $\tau_2 \text{ (ns)}$ | $\chi_2$     | $\tau_3 \text{ (ns)}$ | $\chi_3$     | $\chi^2$    |
|--------------|-----------------------|--------------|-----------------------|--------------|-----------------------|--------------|-------------|
| <b>RuFDN</b> | <b>3.03</b>           | <b>27.01</b> | <b>17.90</b>          | <b>3.79</b>  | <b>790.81</b>         | <b>69.20</b> | <b>1.02</b> |
| <b>FDN</b>   | <b>0.65</b>           | <b>7.61</b>  | <b>2.58</b>           | <b>41.24</b> | <b>8.39</b>           | <b>51.15</b> | <b>1.09</b> |

**Table ST2.** Fluorescence decay parameters for RuFDN and FDN. Three lifetimes ( $\tau_1$ ,  $\tau_2$ ,  $\tau_3$ ) and the respective fractional contributions ( $\chi_1$ ,  $\chi_2$ ,  $\chi_3$ ) and the  $\chi^2$  values for the data in Figure S7 are shown.

RuFDNs exhibited a triexponential decay with lifetimes 3.03 ns (27.01%), 17.90 ns (3.79%) and 790.81 ns (69.2%) ( $\lambda_{\text{exc}} = 440 \text{ nm}$ ,  $\chi^2 = 1.02$ ). The short components (3.03 ns and 17.9 ns) observed corresponds to the FDN moiety of the RuFDN and the longer components observed in lifetime 790.81 ns corresponds to the ruthenium(II) bipyridine complex unit of the RuFDN

## Self-assembly of RuFDNs

### 9. TEM and AFM images of RuFDN at $5 \times 10^{-4}$ M concentration in water

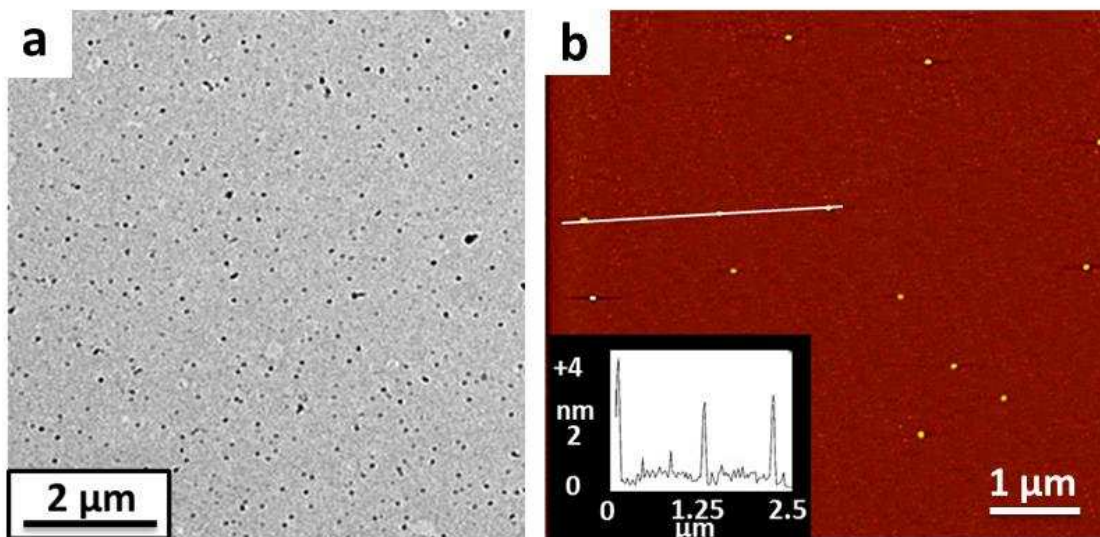

**Figure S8.** (a) TEM and (b) AFM images of RuFDN (in water) at  $5 \times 10^{-4}$  M concentration. Inset of (b) shows the height profile of the AFM image.

### 10. AFM images of RuFDN in dichloromethane

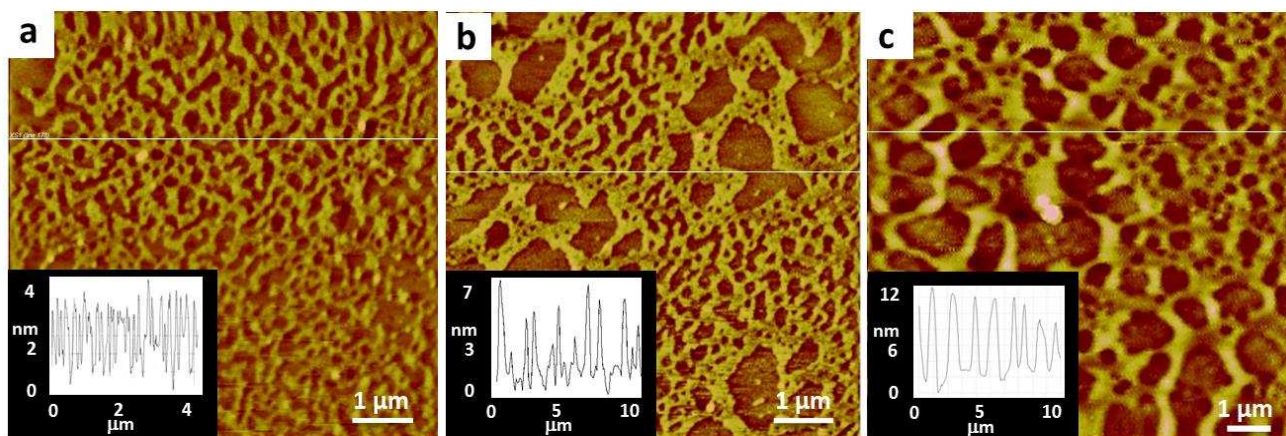

**Figure S9.** AFM images of RuFDN (in dichloromethane) at different concentrations: (a)  $5 \times 10^{-6}$  M, (b)  $5 \times 10^{-5}$  M and (c)  $5 \times 10^{-4}$  M. Inset of (a, b, c) – Height profile of respective images.

11. TEM image of RuFDN in acetonitrile

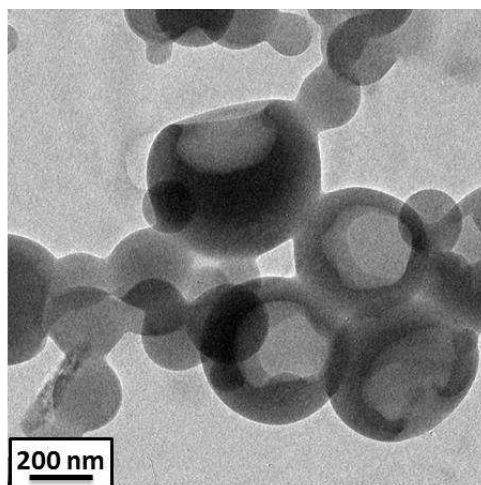

**Figure S10.** TEM image obtained by drop-casting RuFDN in acetonitrile (Conc.:  $5 \times 10^{-4}$  M).

12. AFM images of RuFDN in acetone

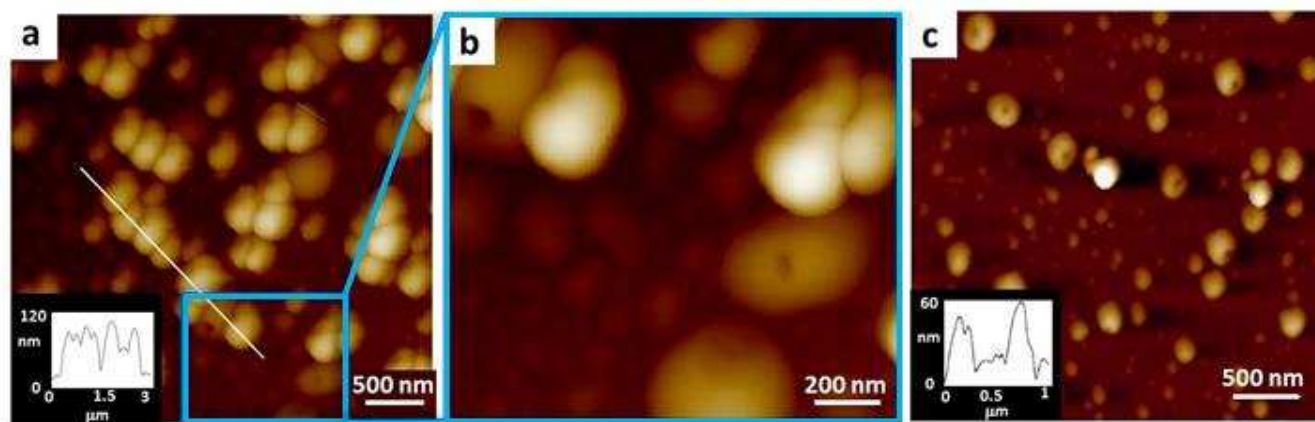

**Figure S11.** AFM images of RuFDN (in acetone) obtained by fast evaporation of solvent at (a)  $5 \times 10^{-4}$  M and (c)  $5 \times 10^{-5}$  M concentrations. (b) Zoomed in image of particles at  $5 \times 10^{-4}$  M concentration.



### 13. SEM and confocal fluorescence images of RuFDN

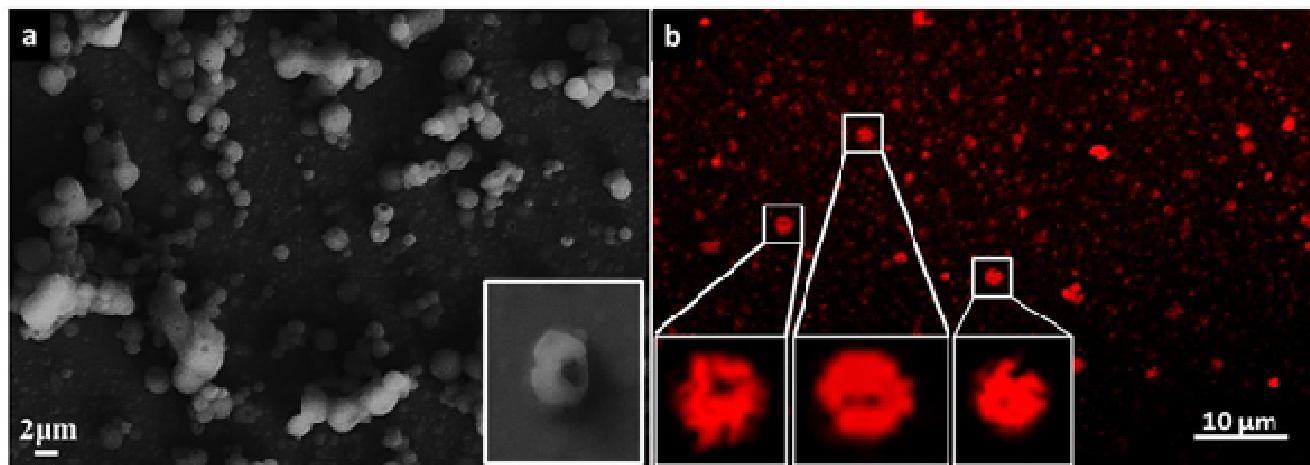

**Figure S12.** (a) SEM and (b) confocal fluorescence images of RuFDN at a concentration of  $1.3 \times 10^{-3}$  M in acetone. Inset of (a, b) shows the zoomed in image of the microcapsules.

### 14. Zeta potential measurements

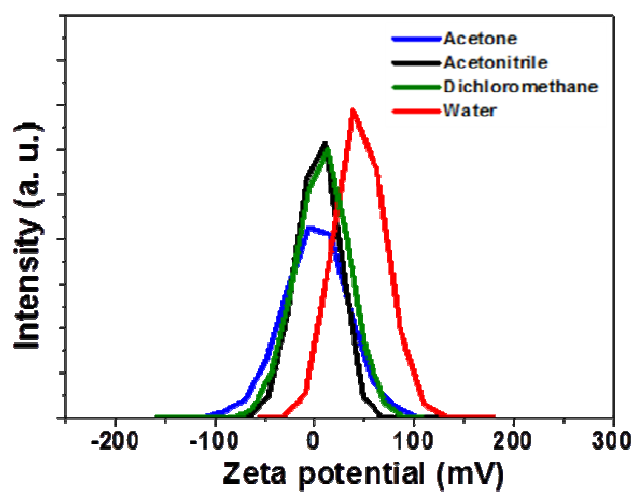

**Figure S13.** Zeta potential curve of RuFDN in different solvents.

## 15. Quenching studies

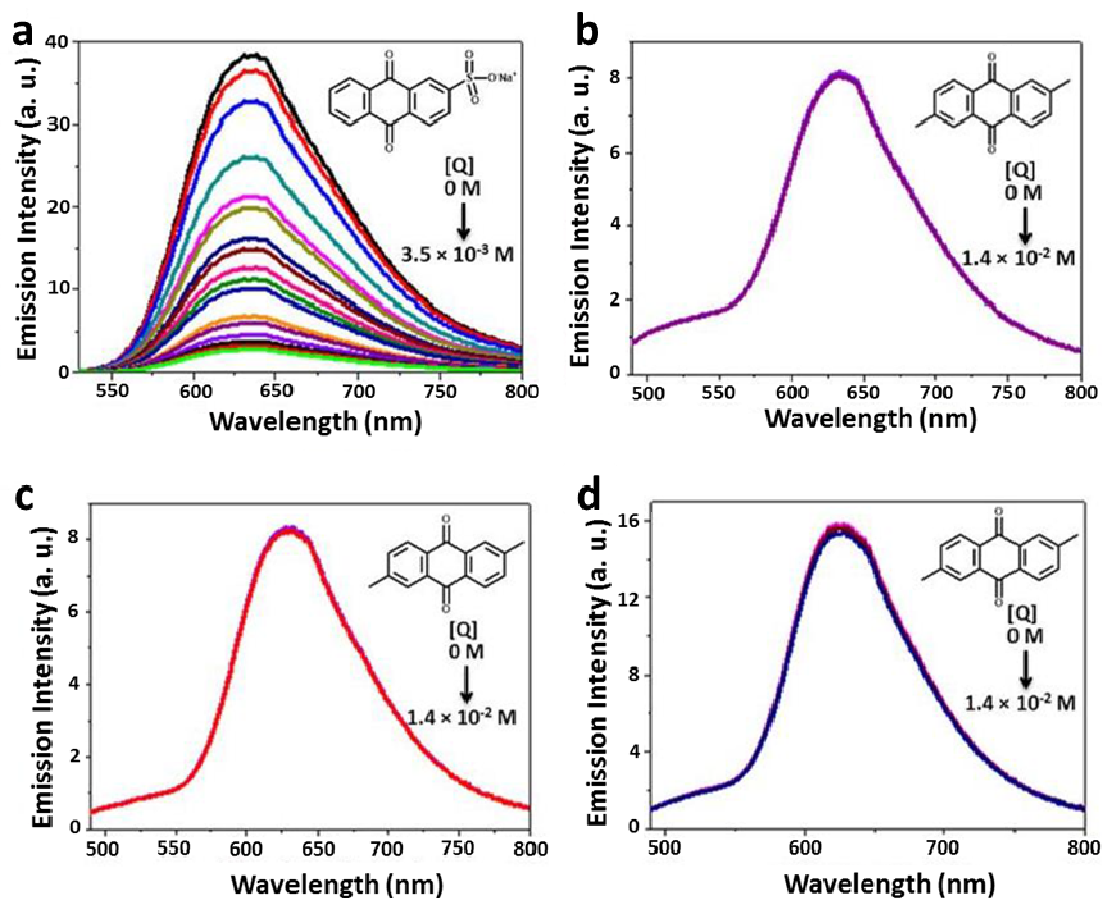

**Figure S14.** Emission spectra of RuFDN ( $1.4 \times 10^{-4}$  M) in different solvents, upon addition of increasing concentrations of anthraquinone quenchers: (a) water, (b) acetone, (c) acetonitrile and (d) dichloromethane. Inset shows the chemical structure of the quencher used in each case.
